# Supplementary material for: First‐Principles Calculation, Synthesis, and Catalytic Properties of Rh‐Cu Alloy Nanoparticles
Source: PubMed Central journal article supplement — Chemistry. 2016 Nov 23;23(1):57–60. doi: 10.1002/chem.201604286 (PMC5724656; doi:10.1002/chem.201604286), 2016-11-23
Supplement: CHEM-23-57-s001.pdf [file CHEM-23-57-s001.pdf]

# CHEMISTRY

## A **European** Journal

### Supporting Information

#### **First-Principles Calculation, Synthesis, and Catalytic Properties of Rh-Cu Alloy Nanoparticles**

Tokutaro Komatsu,<sup>\*[a, b]</sup> Hirokazu Kobayashi,<sup>[a, c]</sup> Kohei Kusada,<sup>[a]</sup> Yoshiki Kubota,<sup>[d]</sup>  
Masaki Takata,<sup>[e, f]</sup> Tomokazu Yamamoto,<sup>[g]</sup> Syo Matsumura,<sup>[g]</sup> Katsutoshi Sato,<sup>[h, i]</sup>  
Katsutoshi Nagaoka,<sup>[h, i]</sup> and Hiroshi Kitagawa<sup>\*[a, j, k]</sup>

chem\_201604286\_sm\_miscellaneous\_information.pdf

### EXPERIMENTAL AND CALCULATION DETAILS

#### Identification

Transmission electron microscopy (TEM) images were recorded by using Hitachi HT7700 with acceleration voltage of 100 kV. Energy-dispersive x-ray spectroscopy (EDS) was measured with Bruker Quantax attached to HT7700. High-angle annular dark-field scanning transmission electron microscopy (HAADF-STEM) images and elemental mapping with EDS were obtained with JEOL JEM-ARM200F operated at 200 kV. Powder X-ray diffraction (PXRD) patterns for Rietveld refinement were measured at SPring-8 BL02B2 with X-ray wavelength ( $\lambda = 0.58001, 0.58024 \text{ \AA}$ ) calibrated by the lattice constant of  $\text{CeO}_2$ . High-temperature PXRD patterns were recorded on a sample sealed in a quartz capillary under vacuum. To check for crystalline impurity and phase separation, PXRD patterns for Le Bail fitting were recorded with Bruker D8 Advance.

#### Measurement of three-way catalytic activity

The synthesized  $\text{Rh}_{1-x}\text{Cu}_x$  nanoparticles were supported on  $\gamma\text{-Al}_2\text{O}_3$  catalysts by wet impregnation. The amount of nanoparticles was 1 wt% of  $\gamma\text{-Al}_2\text{O}_3$ . Three-way catalytic activity was measured between  $T = 25 - 600 \text{ }^\circ\text{C}$  on a gas mixture of  $\text{CO}$ : 5046 ppm,  $\text{O}_2$ : 4920 ppm,  $\text{H}_2$ : 1758 ppm,  $\text{CO}_2$ : 12.45 %,  $\text{C}_3\text{H}_6$ : 467 ppm,  $\text{NO}$ : 1161 ppm and He balance at a total flow rate of  $200 \text{ ml min}^{-1}$ . The space velocity was set to  $3 \times 10^5 \text{ ml g}^{-1} \text{ h}^{-1}$ . The exit composition of the gases was continuously monitored with a chemiluminescence  $\text{NO}_x$  analyser and a non-dispersive infrared gas analyser (VA3000, HORIBA).

#### Band Calculation

Structural optimization based on band calculations were carried out using density functional theory (PBE functional<sup>S1</sup>) implemented in CASTEP<sup>S2</sup> in Materials Studio (Dassault Systèmes Biovia, Inc.). Plane-wave basis functions with a cut-off energy of 300 eV were used with ultrasoft pseudopotentials.<sup>S3</sup> A k-point mesh of  $3 \times 3 \times 3$  was sampled by the Monkhorst–Pack grid method.<sup>S4</sup> The DOS and relative energy were calculated with norm-conserving pseudopotentials, basis-set cut-off of 880 eV, and a k-point mesh of  $13 \times 13 \times 13$  sampled by the Monkhorst–Pack grid method. To count the PDOS, the first Brillouin zone was sampled at  $13 \times 13 \times 13$  k points with interpolation. The  $\text{DOS}(E_F)$  is defined as the averaged DOS within  $\pm 0.1 \text{ eV}$  of  $E_F$ .

The calculation models were derived from  $2 \times 2 \times 2$  supercell based on face-centred cubic lattice, thus contains 32 atoms. To maintain the cubic symmetry, the supercell was assumed to belong to space group  $\text{Pm}\bar{3}\text{m}$ . The symmetry-related sites are listed in Table S1. Due to the constraint by the symmetry, number of Cu atoms in the model is limited to 0-8, 12-20 and 24-32.

Table S1. Fractional coordinates of symmetry-related sites in  $2 \times 2 \times 2$  supercell based on face-centred cubic lattice.

| Site 1a (1 site) | Site 1b (1 site) | Site 2a (3 sites) | Site 2b (3 sites) | Site 3a (12 sites) | Site 3b (12 sites) |
|------------------|------------------|-------------------|-------------------|--------------------|--------------------|
| (0, 0, 0)        | (0.5, 0.5, 0.5)  | (0, 0.5, 0.5)     | (0.5, 0, 0)       | (0, 0.25, 0.25)    | (0.5, 0.25, 0.25)  |
|                  |                  | (0.5, 0, 0.5)     | (0, 0.5, 0)       | (0.25, 0, 0.25)    | (0.25, 0.5, 0.25)  |
|                  |                  | (0.5, 0.5, 0)     | (0, 0, 0.5)       | (0.25, 0.25, 0)    | (0.25, 0.25, 0.5)  |
|                  |                  |                   |                   | (0, 0.75, 0.75)    | (0.5, 0.75, 0.75)  |
|                  |                  |                   |                   | (0.75, 0, 0.75)    | (0.75, 0.5, 0.75)  |
|                  |                  |                   |                   | (0.75, 0.75, 0)    | (0.75, 0.75, 0.5)  |
|                  |                  |                   |                   | (0, 0.25, 0.75)    | (0.5, 0.25, 0.75)  |
|                  |                  |                   |                   | (0.75, 0, 0.25)    | (0.75, 0.5, 0.25)  |
|                  |                  |                   |                   | (0.25, 0.75, 0)    | (0.25, 0.75, 0.5)  |
|                  |                  |                   |                   | (0, 0.75, 0.25)    | (0.5, 0.75, 0.25)  |
|                  |                  |                   |                   | (0.25, 0, 0.75)    | (0.25, 0.5, 0.75)  |
|                  |                  |                   |                   | (0.75, 0.25, 0)    | (0.75, 0.25, 0.5)  |

## RESULTS

### Band Calculation

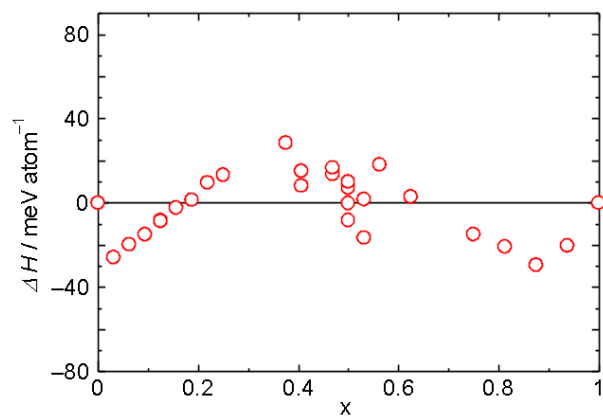

**Figure S1.** Formation enthalpy of  $\text{Rh}_{1-x}\text{Cu}_x$  ordered alloy calculated with density-functional theory.

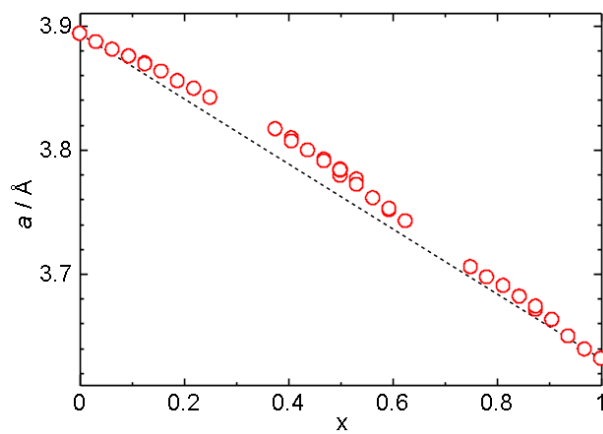

**Figure S2.** Lattice parameter of  $\text{Rh}_{1-x}\text{Cu}_x$  ordered alloy calculated with density-functional theory.

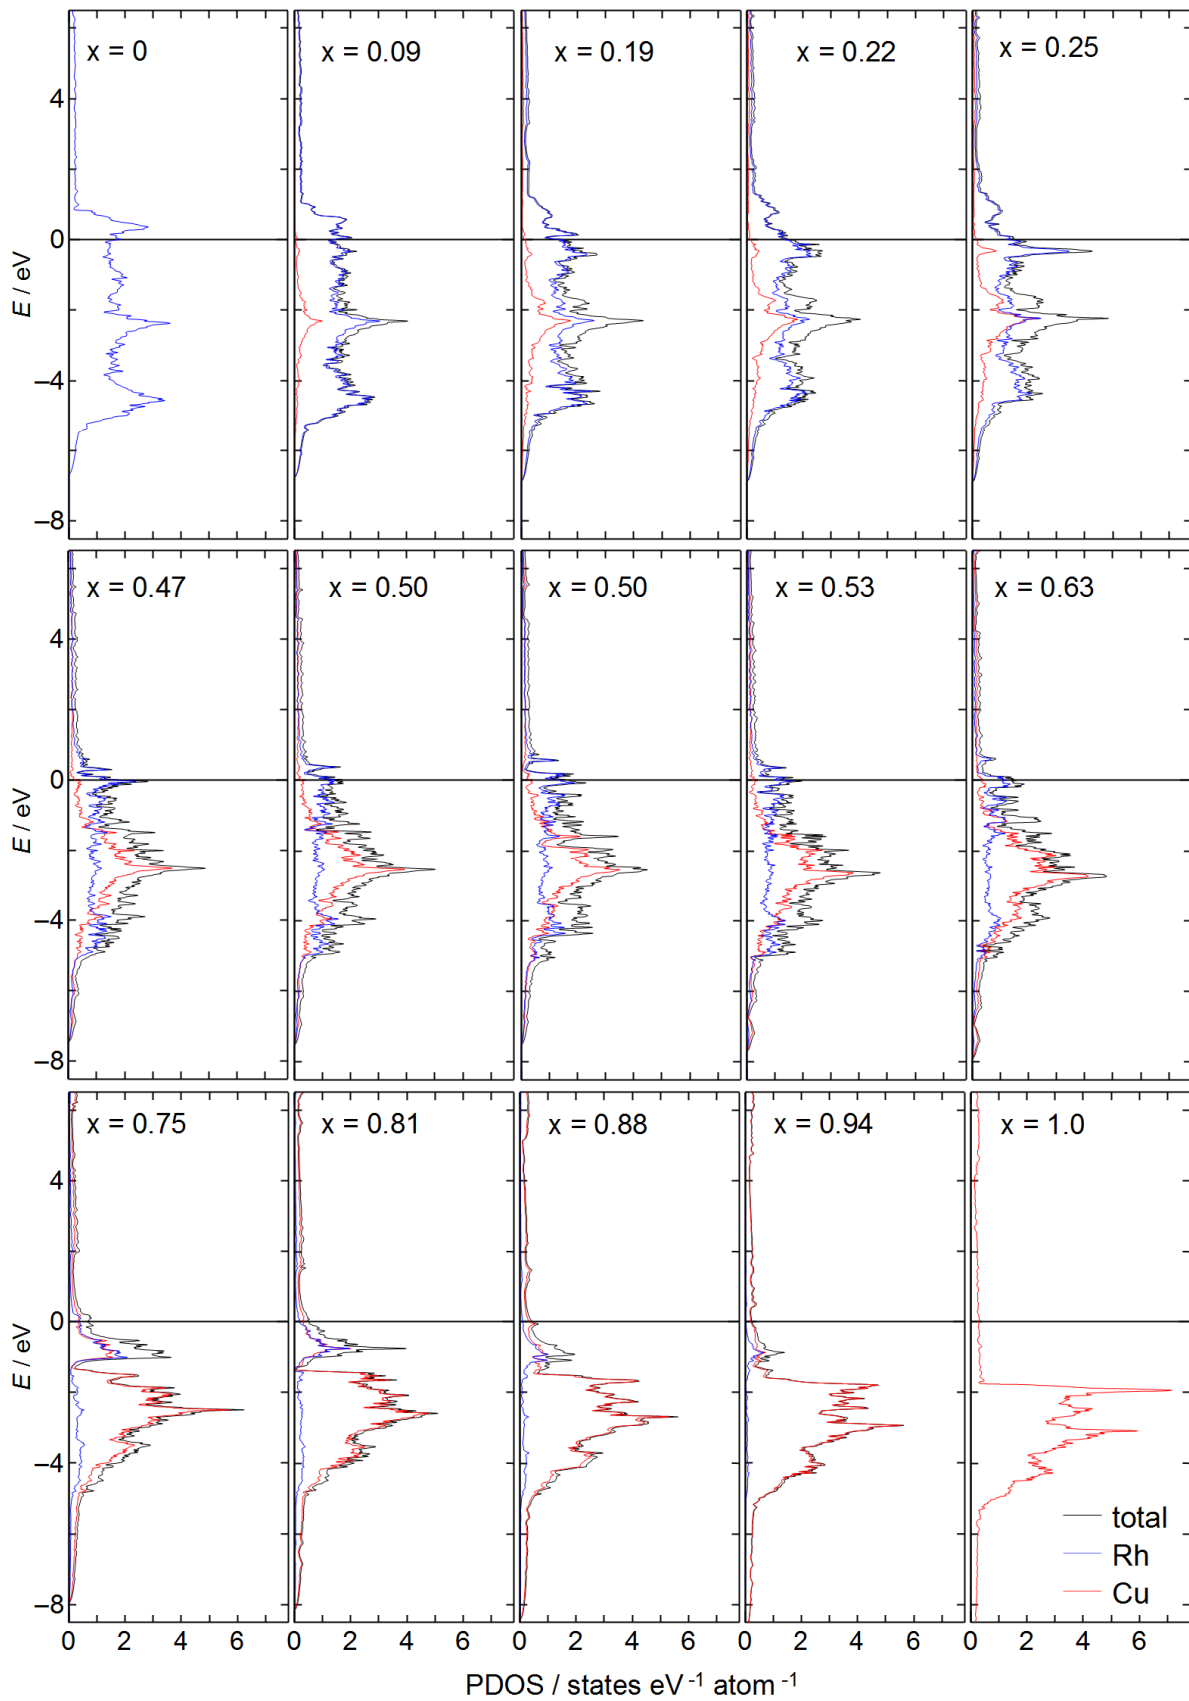

**Figure S3.** Calculated partial density of states (PDOS) of  $\text{Rh}_{1-x}\text{Cu}_x$  ordered alloys.

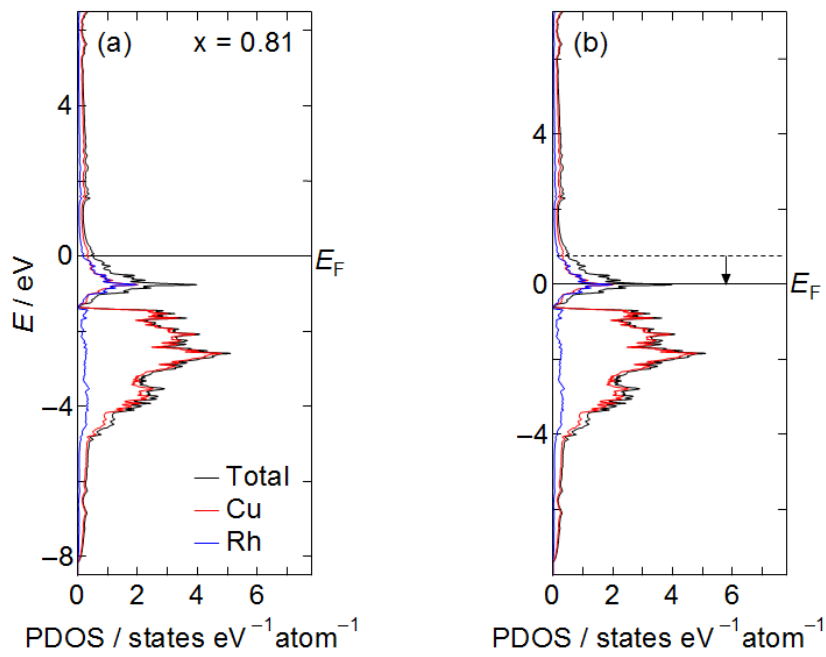

**Figure S4.** Calculated partial density of states (PDOS) of Cu-rich  $\text{Rh}_{1-x}\text{Cu}_x$  ordered alloy (a). Removal of 0.8 electron per atom can lower the Fermi level ( $E_F$ ) (b). The electron withdrawal would increase the  $\text{DOS}(E_F)$  to ca. 4 states  $\text{eV}^{-1}\text{atom}^{-1}$ .

## Synthesis and Characterisation of the sample

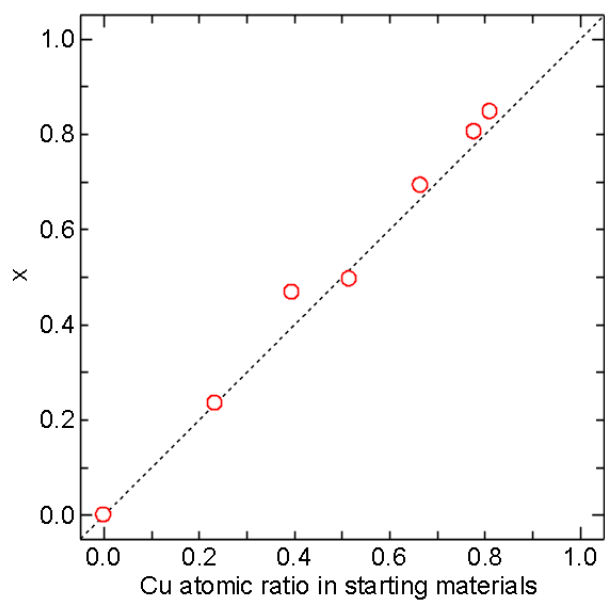

**Figure S5.** Content in Rh<sub>1-x</sub>Cu<sub>x</sub> nanoparticles plotted against the Cu atomic ratio in starting materials.

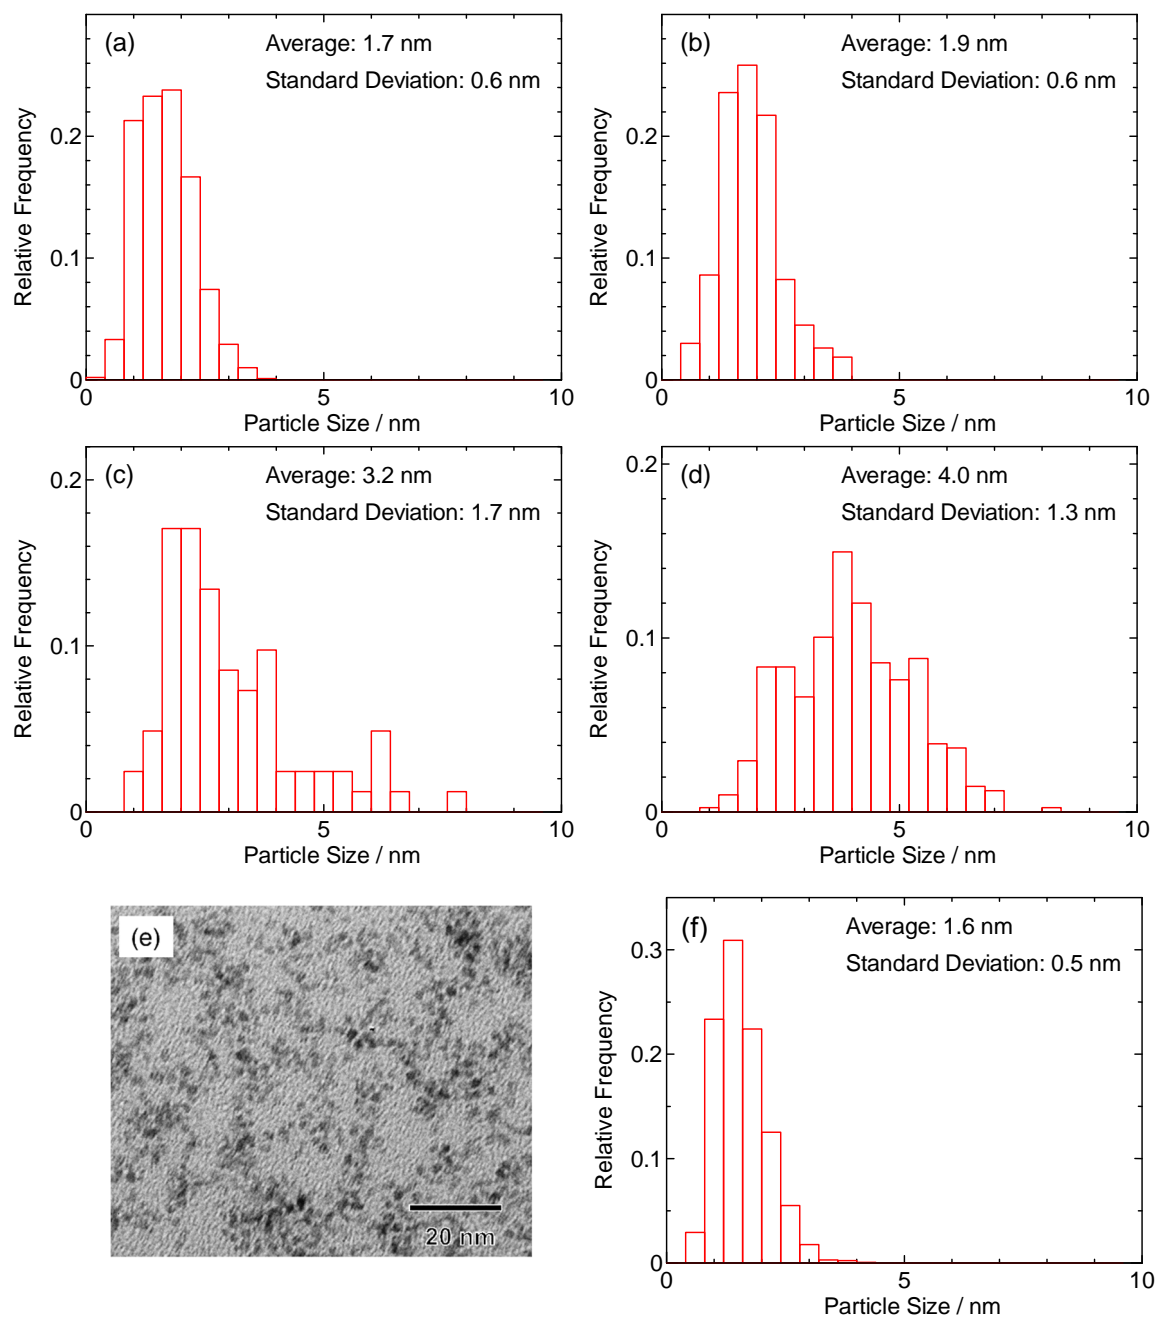

**Figure S6.** Size distributions obtained from TEM images of Rh<sub>1-x</sub>Cu<sub>x</sub> nanoparticles with x = 0.17 (a), 0.50 (b) 0.69 (c) and 0.81 (d). TEM image (e) and size distribution (f) of Rh nanoparticles (x=0).



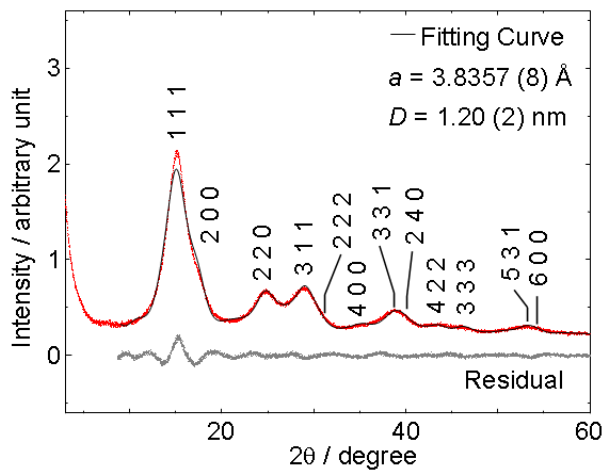

**Figure S7.** PXRD pattern ( $\lambda = 0.58001 \text{ \AA}$ ) and results of Rietveld refinement for  $\text{Rh}_{1-x}\text{Cu}_x$  nanoparticles with  $x = 0.17$ .

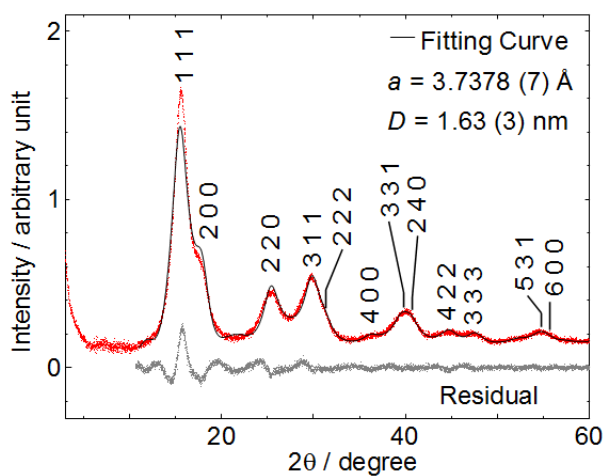

**Figure S8.** PXRD pattern ( $\lambda = 0.58024 \text{ \AA}$ ) and results of Rietveld refinement for  $\text{Rh}_{1-x}\text{Cu}_x$  nanoparticles with  $x = 0.50$ .

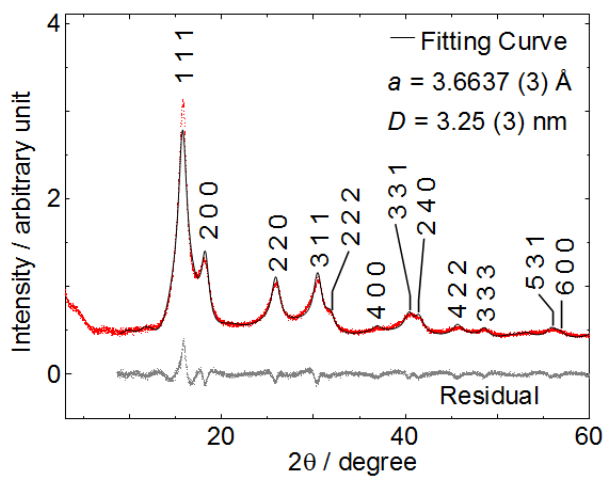

**Figure S9.** PXRD pattern ( $\lambda = 0.58001 \text{ \AA}$ ) and results of Rietveld refinement for  $\text{Rh}_{1-x}\text{Cu}_x$  nanoparticles with  $x = 0.69$ .

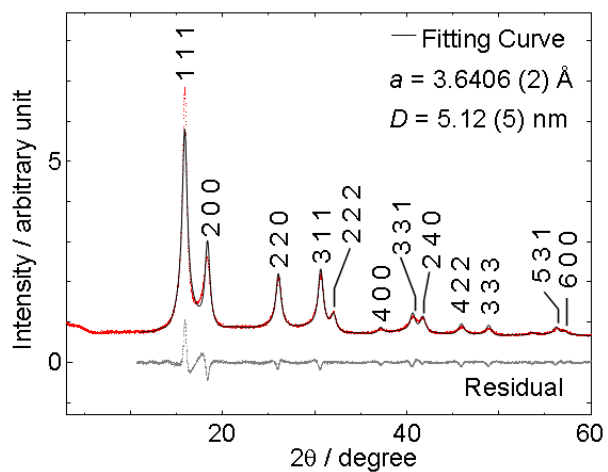

**Figure S10.** PXRD pattern ( $\lambda = 0.58001 \text{ \AA}$ ) and results of Rietveld refinement for  $\text{Rh}_{1-x}\text{Cu}_x$  nanoparticles with  $x = 0.81$ .

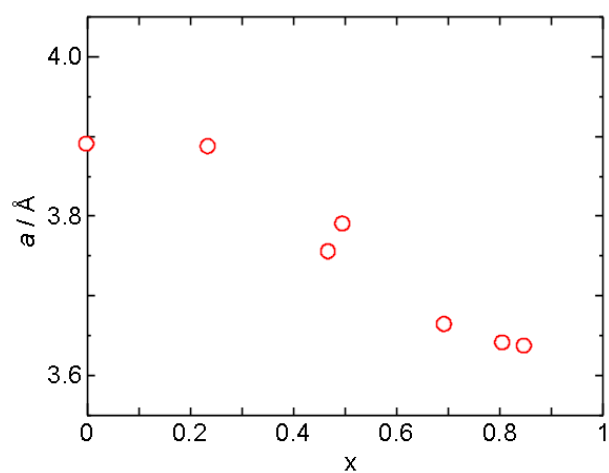

**Figure S11.** The lattice parameter of  $\text{Rh}_{1-x}\text{Cu}_x$  nanoparticles obtained by PXRD measurements.

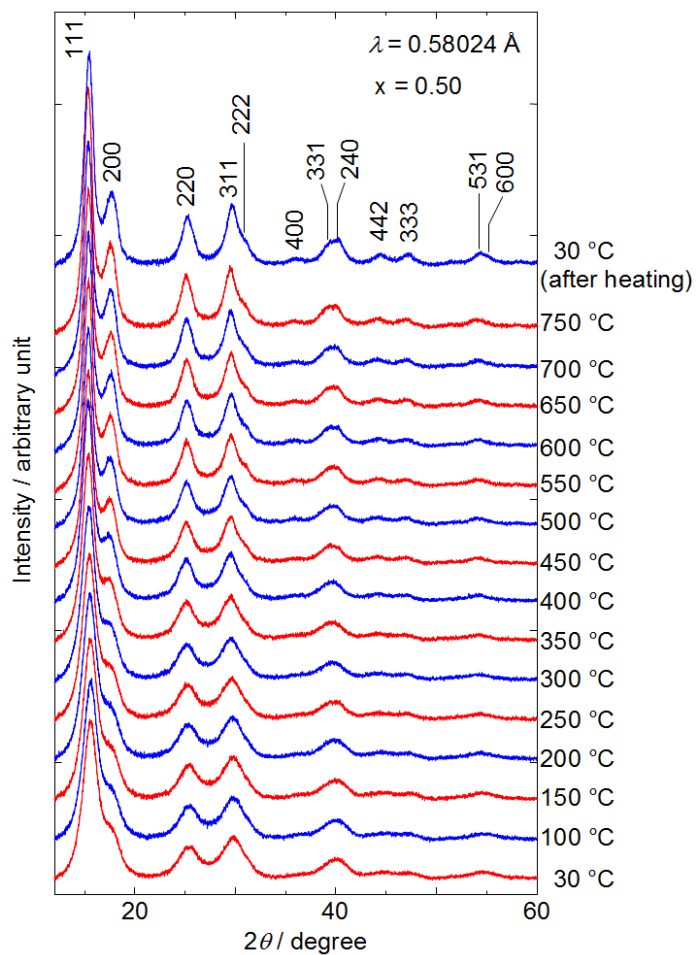

**Figure S12.** Powder X-ray diffraction pattern at elevated temperatures of  $\text{Rh}_{1-x}\text{Cu}_x$  nanoparticles. No peak splitting due to phase separation is observed.

## Catalytic activities

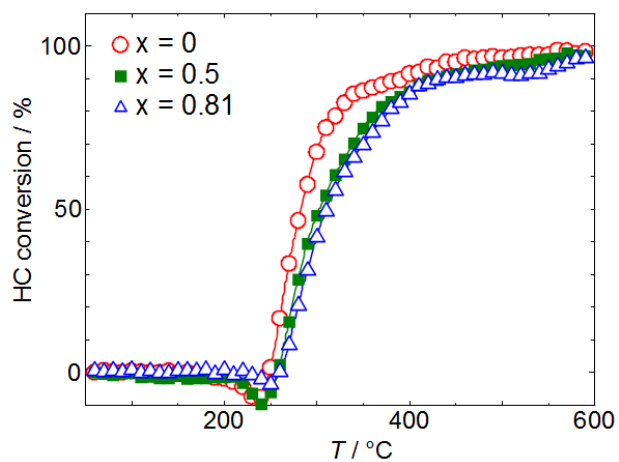

**Figure S13.** Temperature dependence of hydrocarbon (HC) conversion of  $\text{Rh}_{1-x}\text{Cu}_x$  nanoparticles in three-way catalytic reaction.

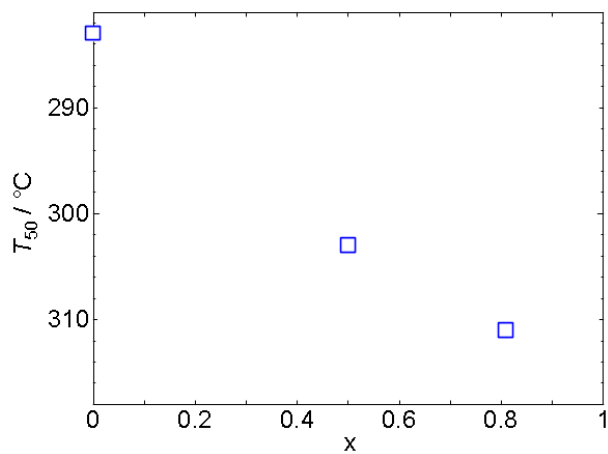

**Figure S14.** Catalytic activity ( $T_{50}$ ) in hydrocarbon oxidation as three-way catalyst of  $\text{Rh}_{1-x}\text{Cu}_x$  nanoparticles.

## References

- [S1] J. P. Perdew, K. Burke, M. Ernzerhof, *Phys. Rev. Lett.* **1996**, *77*, 3865-3868.
- [S2] S. J. Clark, M. D. Segall, C. J. Pickard, P. J. Hasnip, M. J. Probert, K. Refson, M. C. Payne, *Zeitschrift fur Kristallographie* **2005**, *220*, 567-570.
- [S3] D. Vanderbilt, *Phys. Rev. B* **1990**, *41*, 7892-7895.
- [S4] H. J. Monkhorst, J. D. Pack, *Phys. Rev. B* **1976**, *13*, 5188-5192.
